# Supplementary material for: Cholecystokinin induces crowing in chickens
Source: PubMed Central journal article supplement (PMC6408447; doi:10.1038/s41598-019-40746-9), 2019-03-08
Supplement: 41598_2019_40746_MOESM1_ESM.pdf [file 41598_2019_40746_MOESM1_ESM.pdf]

## Supplemental Information

### Cholecystokinin induces crowing in chickens

Tsuyoshi Shimmura, Mai Tamura, Shosei Ohashi, Asuka Sasaki, Takamichi Yamanaka, Nobuhiro Nakao, Kunio Ihara, Shinsaku Okamura, Takashi Yoshimura

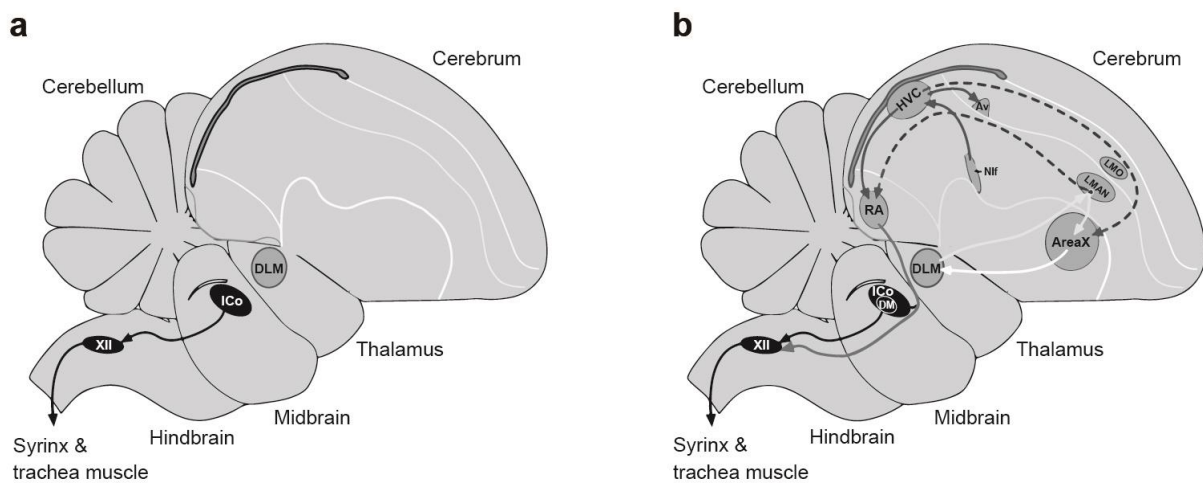

**Supplemental Figure S1 | Schematic drawing of brain nucleus and connectivity of the vocal pathway in chicken (non-vocal learner) and zebra finch (vocal learner).** (a) The forebrain seven song nucleus (b) is absent in chickens while the upstream center to produce sounds is located in the midbrain ICo. (b) Zebra finches have a complex vocal pathway, including the seven song nucleus. The schematic is adapted from Pfenning et al. (2014). Abbreviations: ICo, nucleus intercollicularis; XII, 12th motor nucleus; Nif, nucleus interfacialis; HVC, high vocal center; Av, avalanche; LMO, lateral oval nucleus of the mesopallium; LMAN, lateral magnocellular nucleus of the anterior nidopallium; RA, robust nucleus of the of arcopallium; DLM, dorsolateral nucleus of the medial thalamus; DM, dorsomedial nucleus of the ICo.

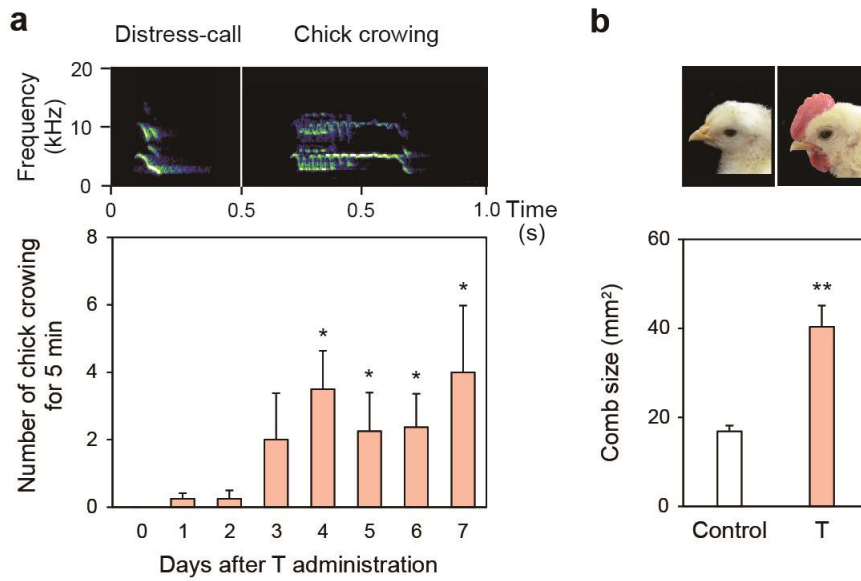

**Supplemental Figure S2 | T-administration induces chick crowing.** (a) Chick crowing of T-administered chicks was observed more frequently 4 d after T administration ( $H = 15.3$ ,  $p < 0.05$ , Kruskal-Wallis' test;  $p < 0.05$ , Shirley-Williams' test, mean  $\pm$  SEM,  $n = 8$ ). (b) Comb size was bigger in T-administered chicks than control chicks at 7 d after T administration ( $t = -4.8$ ,  $p < 0.01$ ,  $t$ -test, mean  $\pm$  SEM,  $n = 8$ ). This experiment was independent of the sample collection for RNA-seq (Figure 2).

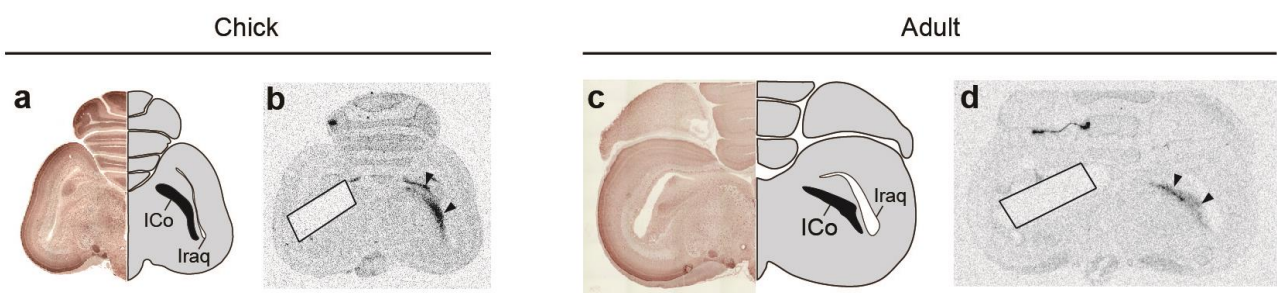

**Supplemental Figure S3 | Validation of ICo punches by *in situ* hybridization.** (a, c) Grey areas on schematic drawings indicate the ICo. On the opposite side are chromatic images that show the acetylcholine esterase stain. (b, d) Black arrowheads on the film indicate expression of the androgen receptor in the ICo. The white areas on the opposite side indicate that the ICo was punched out. Abbreviations: ICo, intercollicular nucleus; Iraq: lateral recess of the aqueduct.

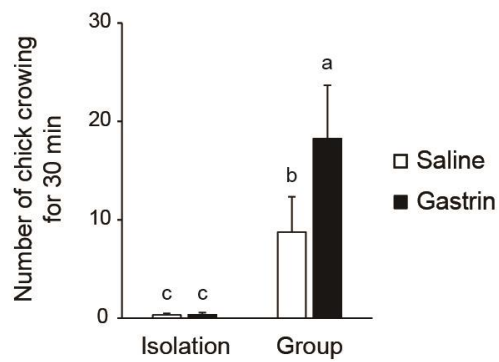

**Supplemental Figure S4 | Chick crowing is observed more frequently when the chicks are kept in groups rather than when the chicks are isolated** ( $F_{1,62} = 54.1$  [situation,  $p < 0.01$ ],  $F_{1,62} = 2.3$  [treatment,  $p > 0.01$ ],  $F_{1,62} = 7.0$  [interaction,  $p < 0.05$ ], ANOVA;  $^{a-c}p < 0.05$ , Tukey-Kramer's test; mean + SE,  $n = 8-25$ ). In group situations, 5 chicks were tested at the same time, and the total amount of chick crowing amongst the 5 chicks was counted and used as a single set of data.

**Supplemental Table S1 | Probe sequences used in *in situ* hybridization.**

| Gene Symbol        | Probe sequence (antisense sequence)                                                                                                                                                                                                |
|--------------------|------------------------------------------------------------------------------------------------------------------------------------------------------------------------------------------------------------------------------------|
| <i>AR</i>          | 5'- AAATAAAGGAGTGACCACCCCCAGGTGCTGCACACAGGGCGTTCC -3'<br>5'- GGAGATTATGCTCAGCTCTGGACAGGTCCTAGAAGCAGGAGAACC -3'<br>5'- GAGCTGCCGCATCCTGACGCATTGGCTGTACATTCTGGATTTGTG -3'<br>5'- TGCACAGCCCTGCTGCCTTCGCAGCAGCAAGTAGGTGTATGCAAG -3'   |
| <i>CCK</i>         | 5'- ATGCTCTGTACCCTGTTCCCTAGGACAGAGAACCTCCCAGTGGAA -3'<br>5'- TCCATCCAGCCCATGTAGTCTCTGTTCATTATCCTGTGTGTGGGA -3'                                                                                                                     |
| <i>CCKAR</i>       | 5'- GCAGAAGAGGCAGAGCATTAAAGTCACTGACTGCCAGGGACAGCAG - 3'<br>5'- TTGTGCAGGTAGCACCCGTCTCCATCCTCGTATTTGGCGATGCTG -3'<br>5'- TCTTGGCCATCAGGTTGGCAGAAGAGCTGCTGCTTCTCACCCCTGT -3'<br>5'- GTGTGTGTAAGAGCACTTGGAGAGCGAAGCCCTTGTCTCTTCCC -3' |
| <i>CCKBR</i>       | 5'- GGTGGGGATGAGGGTGAAGGGCATGCAGCAGAGCGCCAGCATCA - 3'<br>5'- AATGAAGAAGAGGACGAGGAGCAGCAGGACATACCTGGAAGCGCA - 3'<br>5'- AGCAGAGGAAGAACATGGCCACGATGACCACCAGCATGCGGATGA -3'<br>5'- CAGTGGTGTAGCTGAACTTGGAGAGCGATGCGTTGGCGTTGGCCA -3'  |
| <i>HIST1H2B7L4</i> | 5'- TGCACCTGCTTCAGCACCTTGTACACGTAGATCGAGTAGCTCTCC -3'<br>5'- GCACCTGCTTCAGCACCTTGTACACGTAGATCGAGTAGCTCTCCT -3'                                                                                                                     |
